# Supplementary material
Source: PubMed Central journal article supplement (PMC3911191)
Supplement: AEM.03015-13_zam999105086so1.pdf [file AEM.03015-13_zam999105086so1.pdf]

Supplementary Table 1. Type I-E CRISPR-Cas systems in *L. buchneri* genomes and closely related lactobacilli.

| <b>Genus</b>         | <b>Species</b>  | <b>Strain</b> | <b>CRISPR Repeat</b>         | <b>No. of Spacers</b> |
|----------------------|-----------------|---------------|------------------------------|-----------------------|
| <i>Lactobacillus</i> | <i>buchneri</i> | CD 034        | GTATTCCCCACGTACGTAGGGGTGATCC | 48                    |
| <i>Lactobacillus</i> | <i>buchneri</i> | CD 034        | GTATTCCCCACGTGTGTAGGGGTGATCC | 3                     |
| <i>Lactobacillus</i> | <i>buchneri</i> | ATCC 11577    | GTATTCCCCATGTATGTGGGGGTGATCC | 3                     |
| <i>Lactobacillus</i> | <i>brevis</i>   | KB 290        | GTATTCCCCACACATGTGGGGGTGATCC | 28                    |
| <i>Lactobacillus</i> | <i>brevis</i>   | ATCC 367      | GTATTCCCCACACATGTGGGGGTGATCC | 29                    |
| <i>Lactobacillus</i> | <i>brevis</i>   | ATCC 367      | GTATTCCCCACAGGTGTGGGGGTGATCC | 28                    |
